# Supplementary material
Source: MDPI journal article supplement (https://www.mdpi.com/2227-7390/8/12/2180)

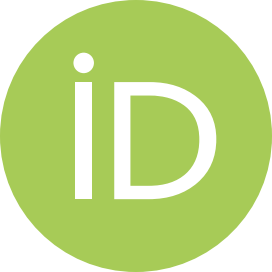

Supplement: s1 [file logo-orcid-eps-converted-to.pdf › mathematics-1017216-SM-xml/Definitions/logo-orcid-eps-converted-to.pdf]

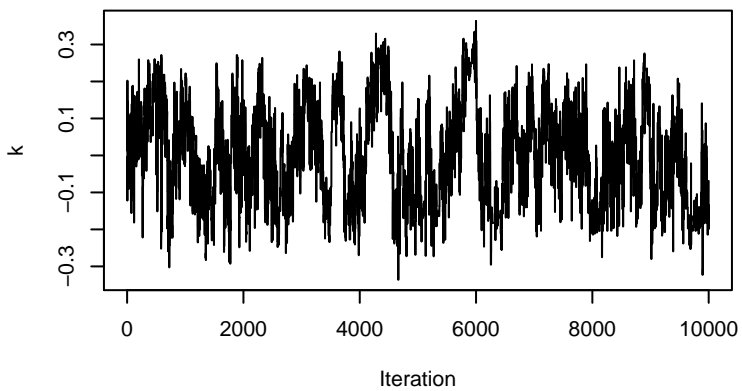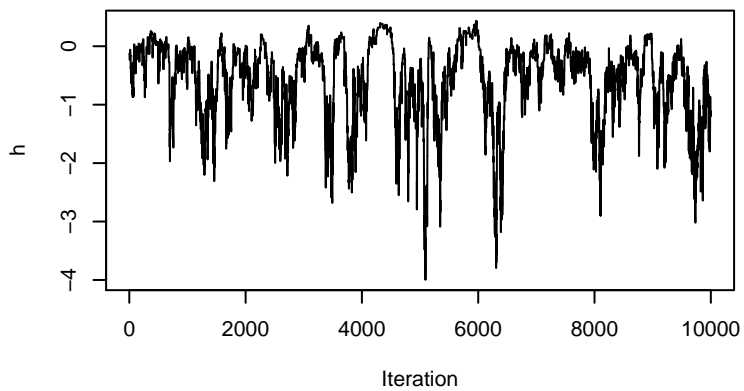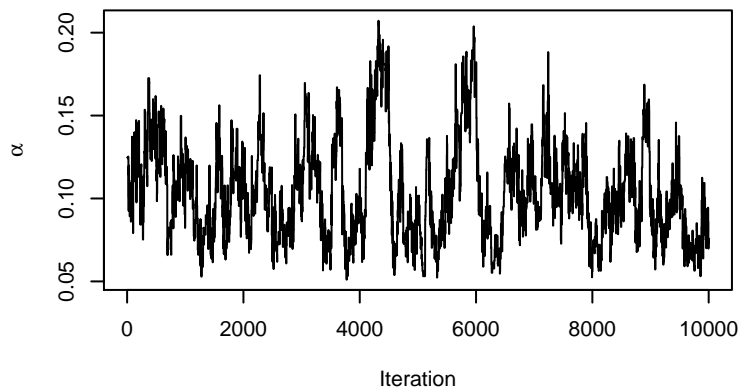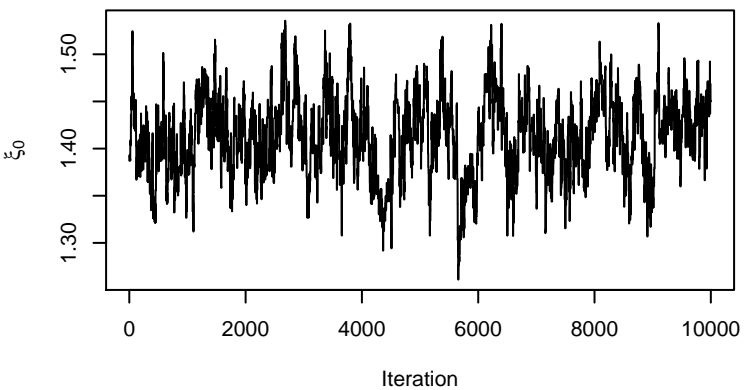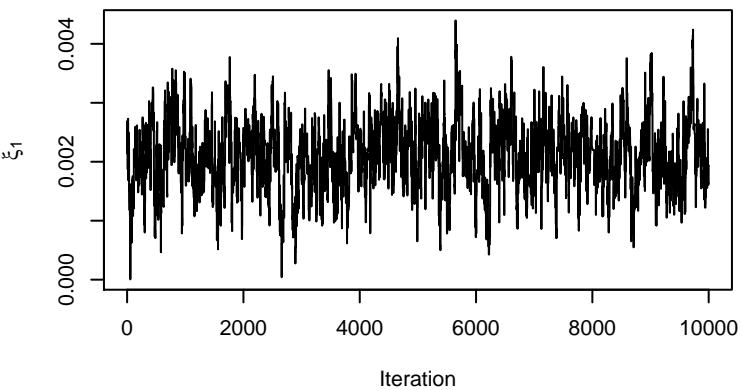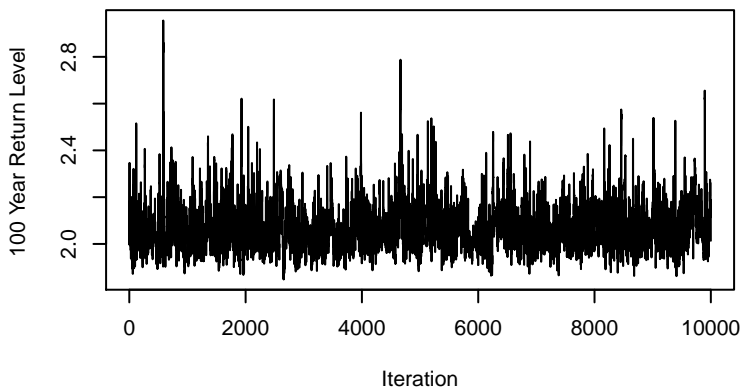

Supplement: s1 [file Fremantle_Trace2.pdf › mathematics-1017216-SM-xml/Fremantle_Trace2.pdf]

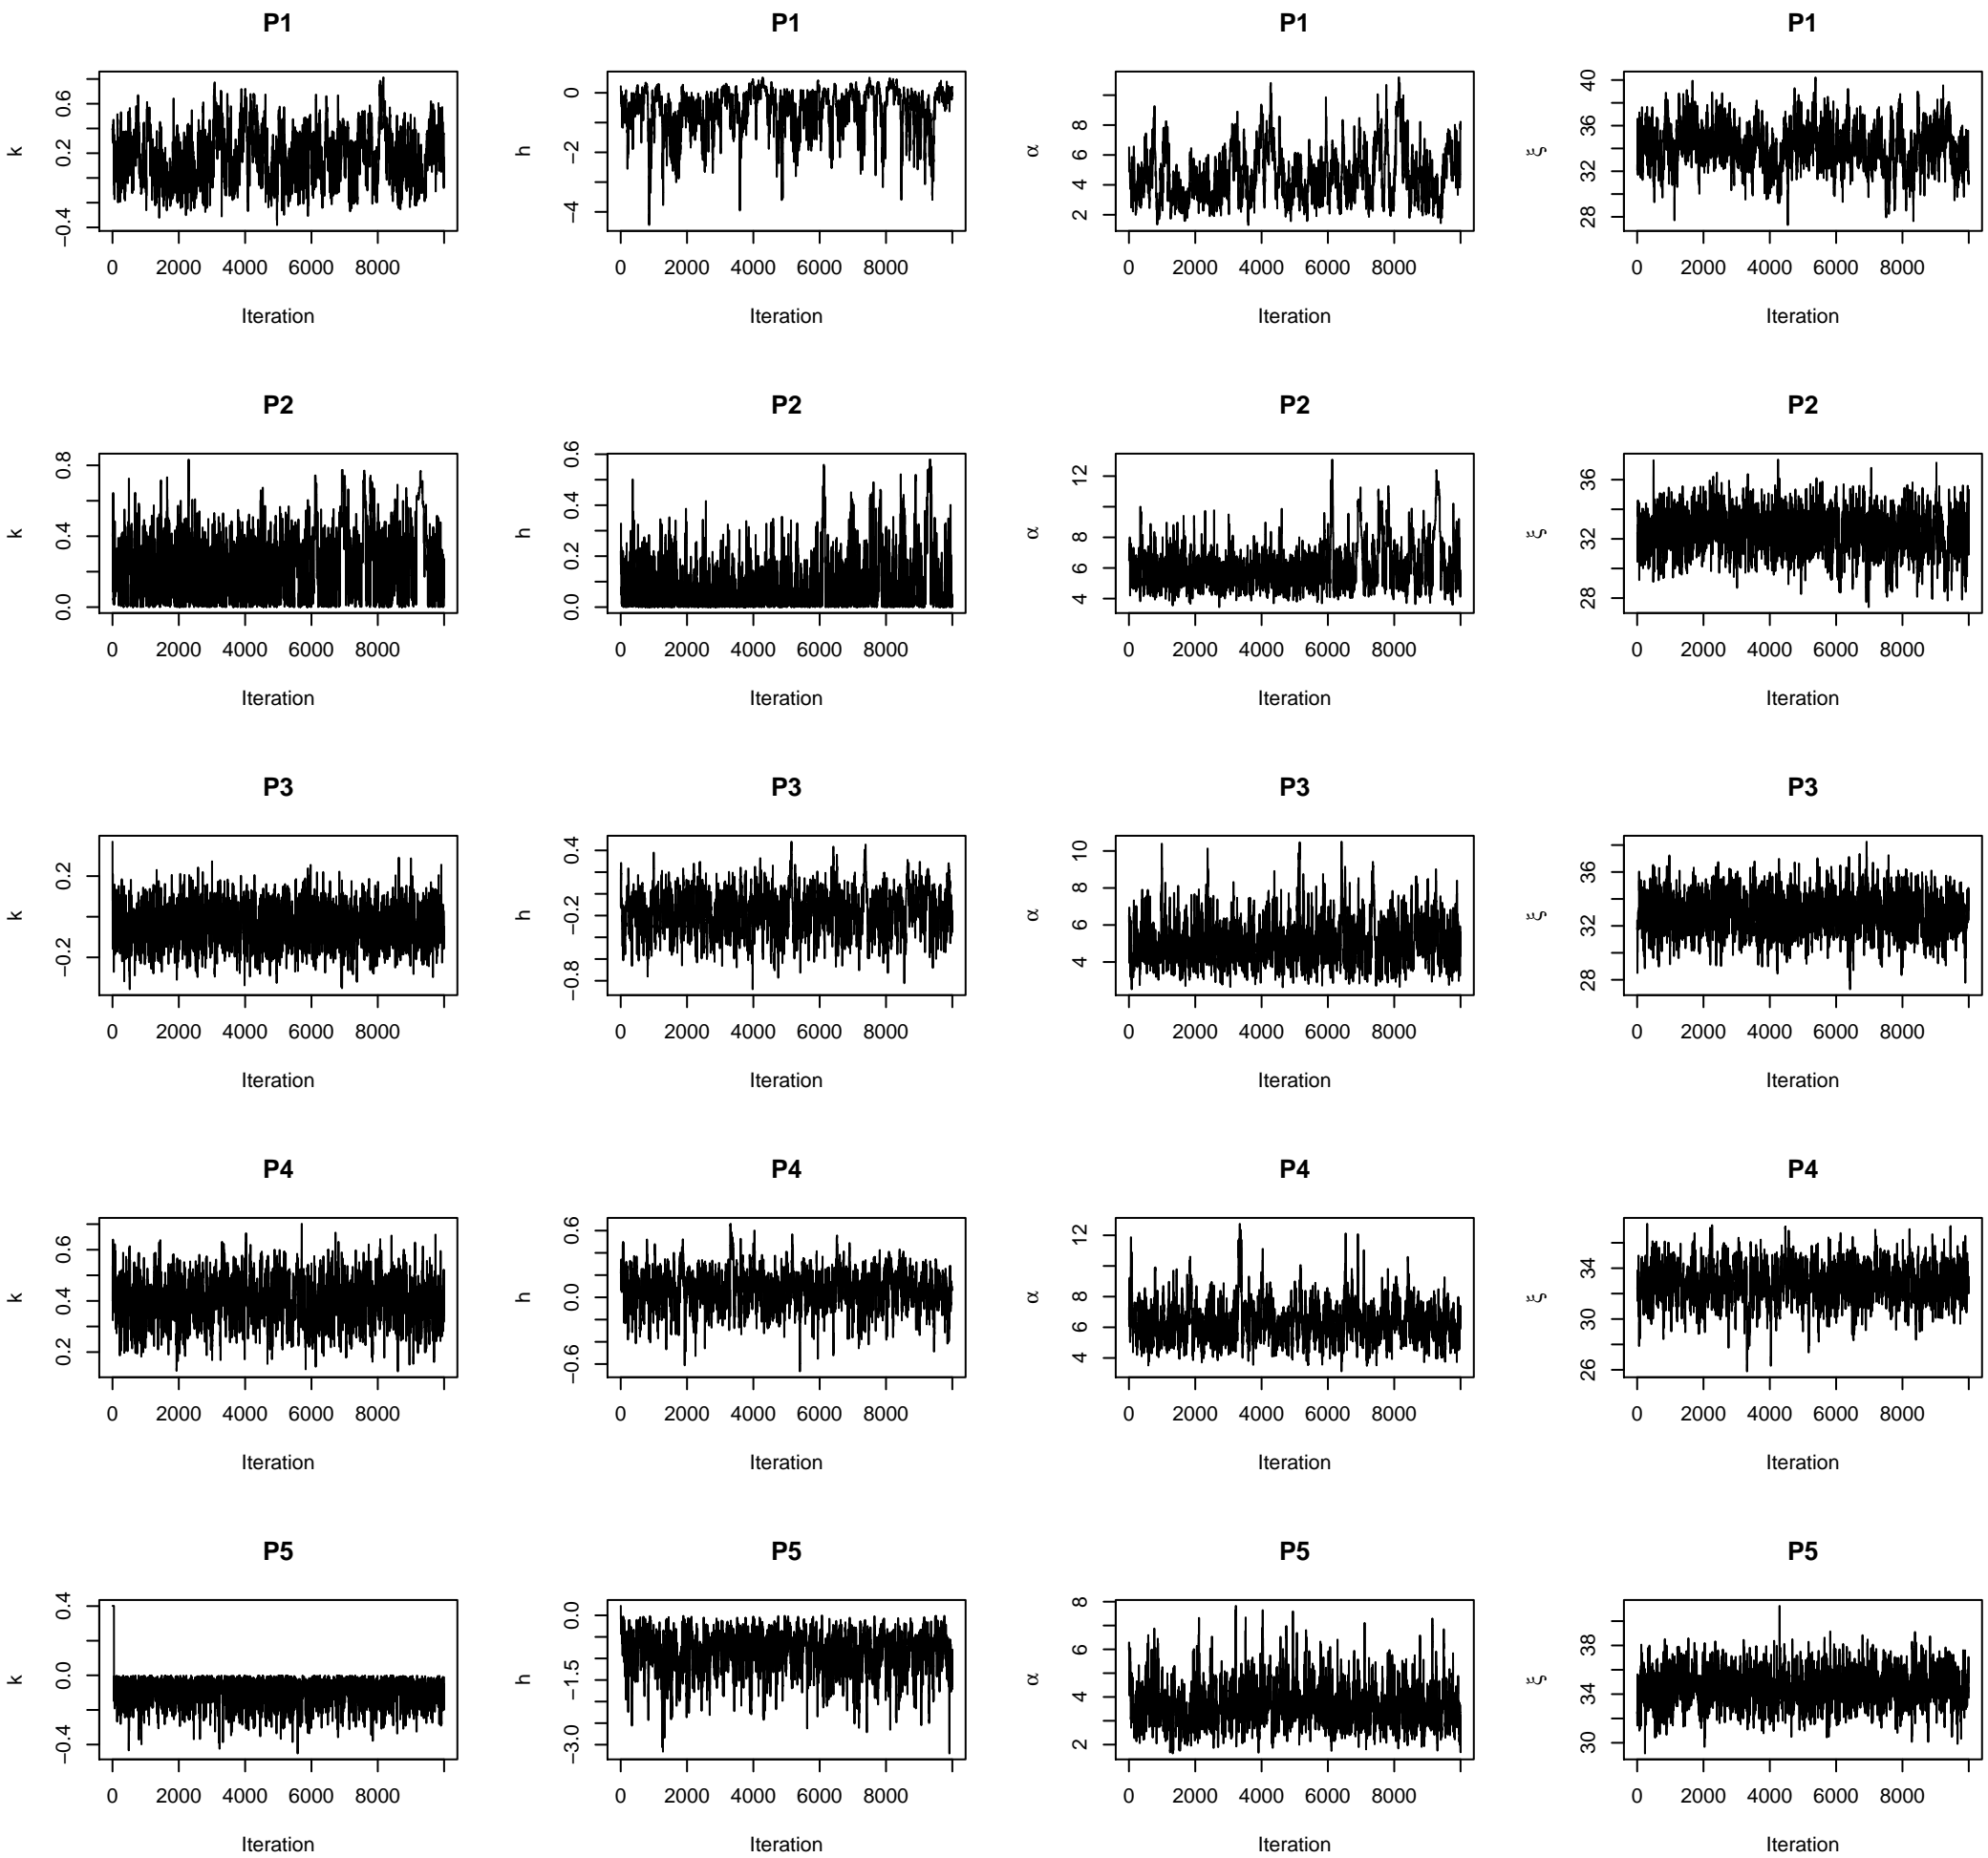

Supplement: s1 [file Udon_Trace3.pdf › mathematics-1017216-SM-xml/Udon_Trace3.pdf]

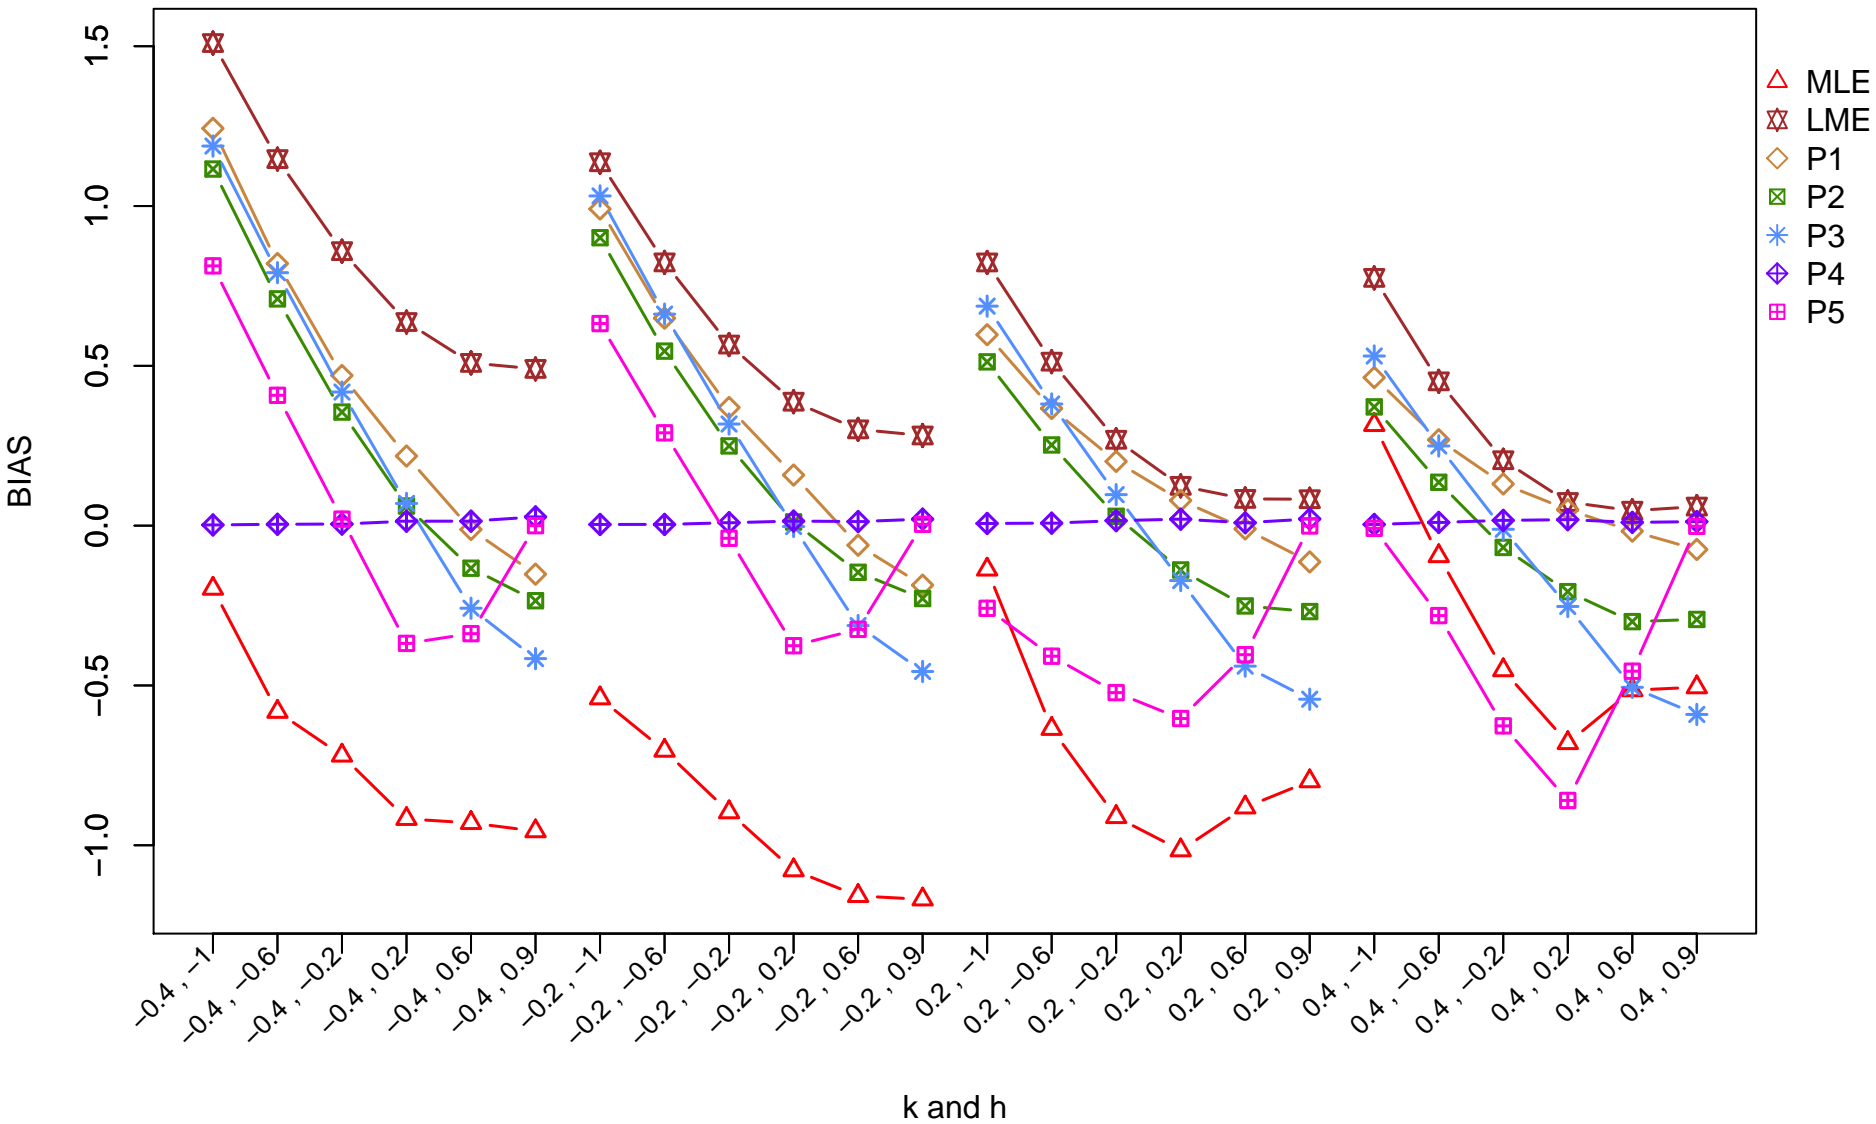

Supplement: s1 [file bias_h_map-pdf.pdf › mathematics-1017216-SM-xml/bias_h_map-pdf.pdf]

BIAS

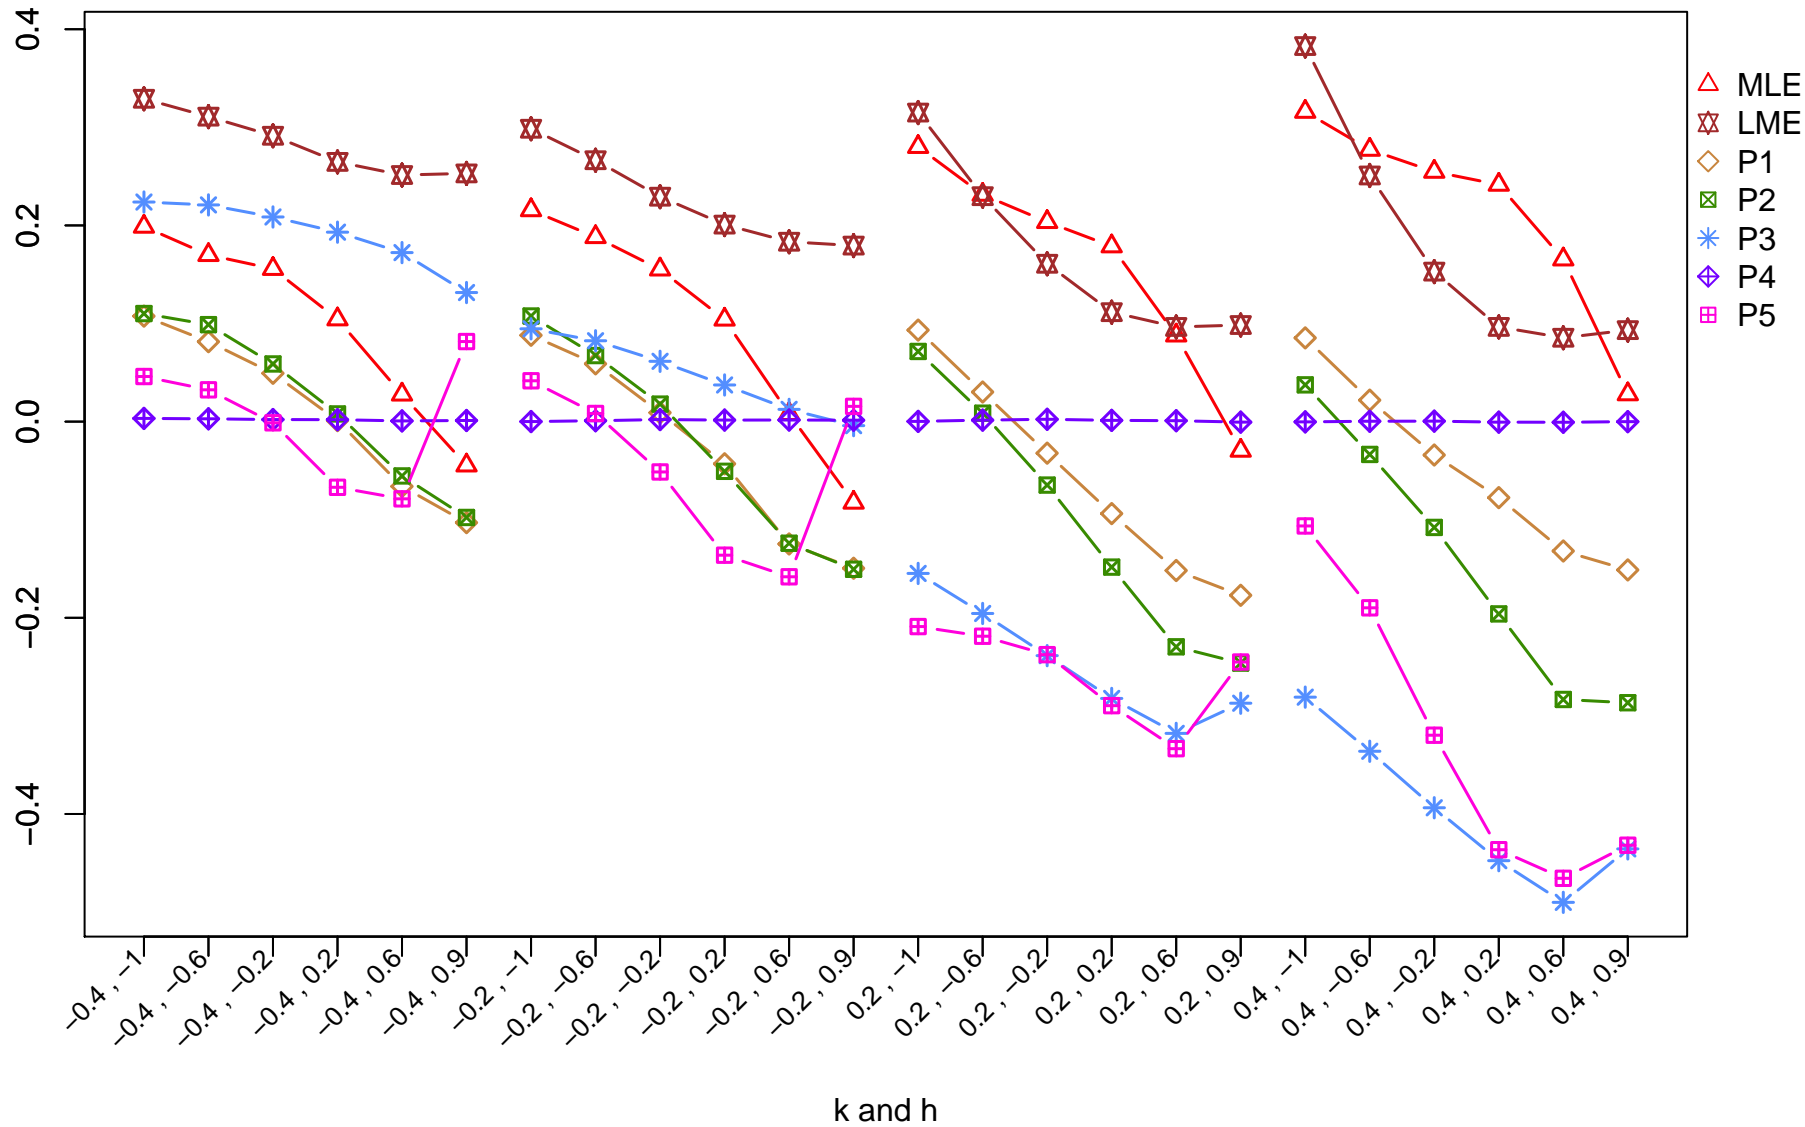

Supplement: s1 [file bias_k_map-pdf.pdf › mathematics-1017216-SM-xml/bias_k_map-pdf.pdf]

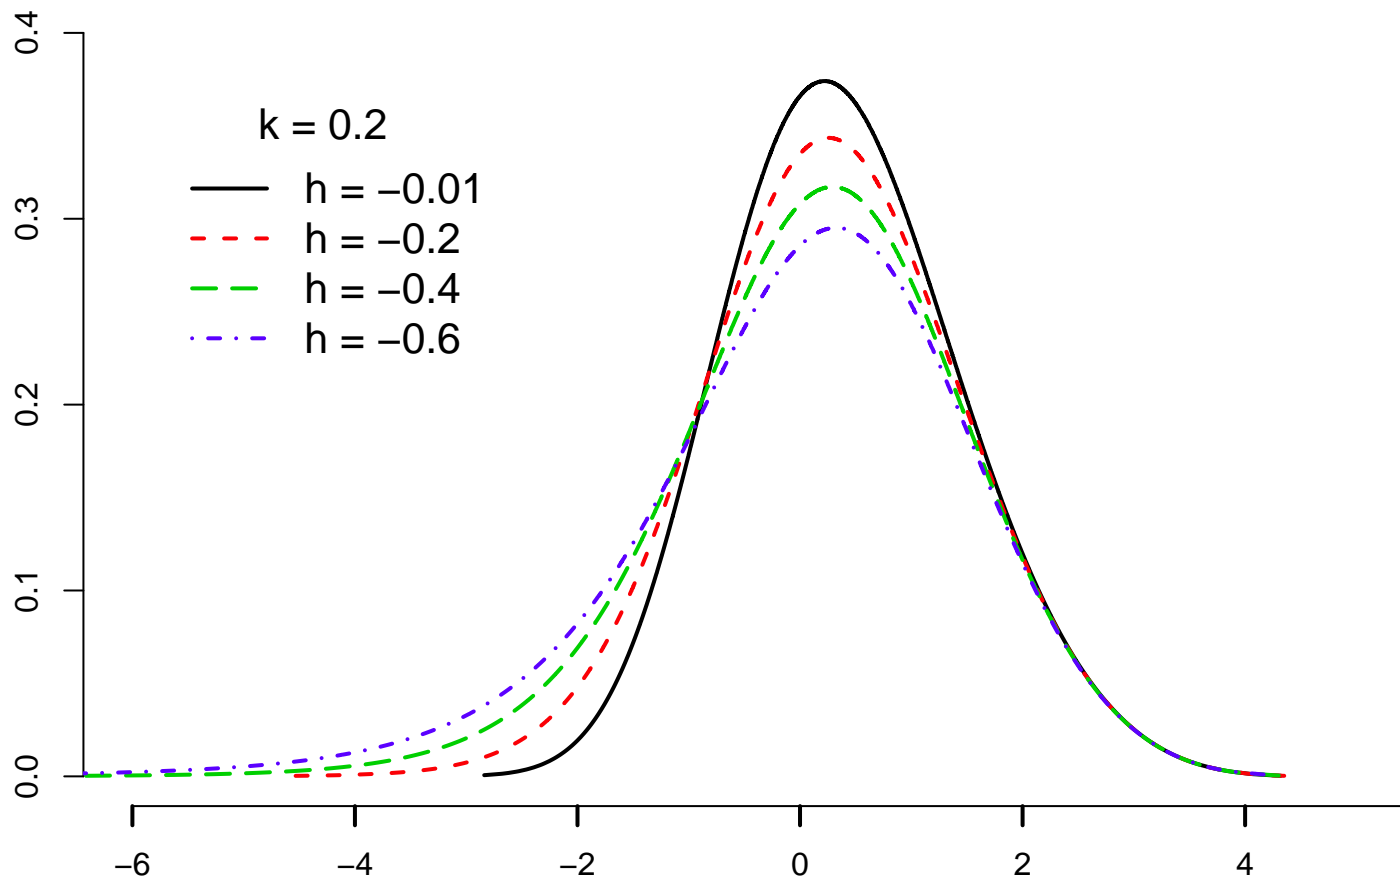

Supplement: s1 [file pdf_k4d1-pdf.pdf › mathematics-1017216-SM-xml/pdf_k4d1-pdf.pdf]

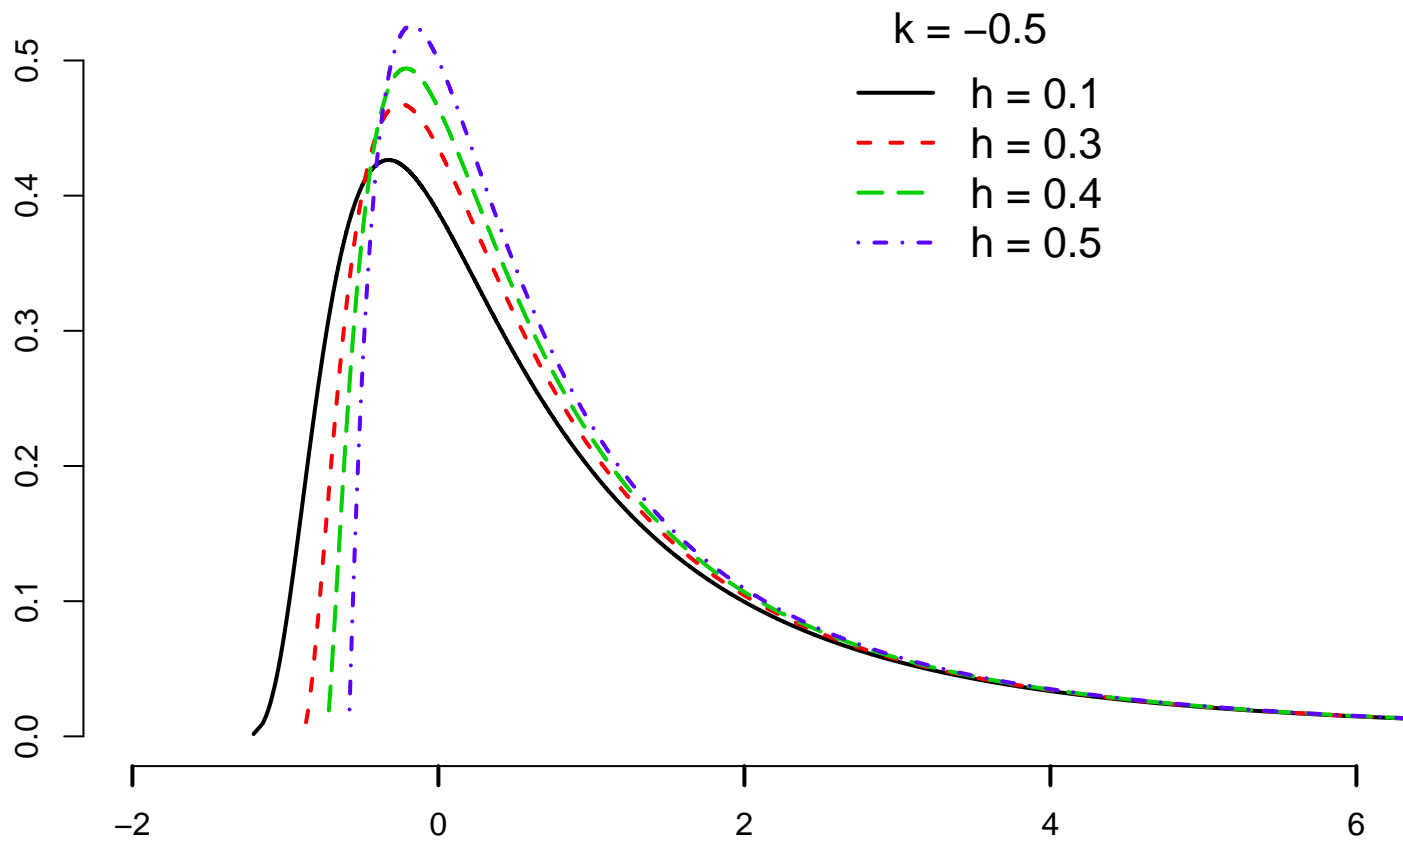

Supplement: s1 [file pdf_k4d2-pdf.pdf › mathematics-1017216-SM-xml/pdf_k4d2-pdf.pdf]

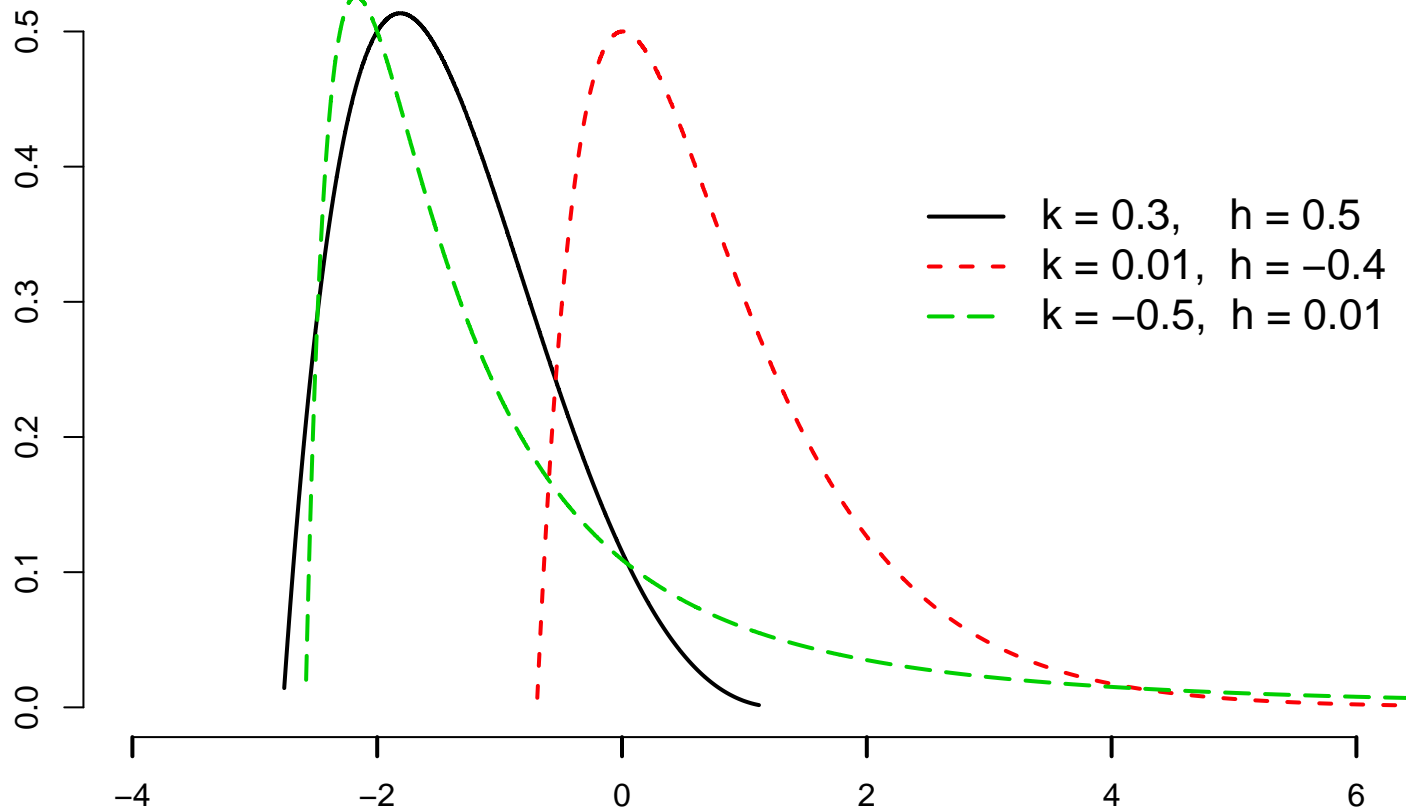

Supplement: s1 [file pdf_k4d3-pdf.pdf › mathematics-1017216-SM-xml/pdf_k4d3-pdf.pdf]

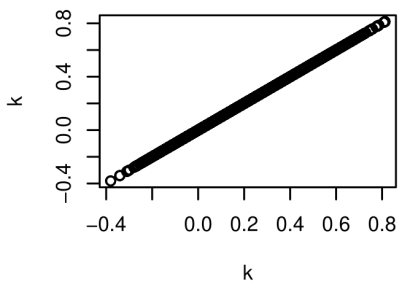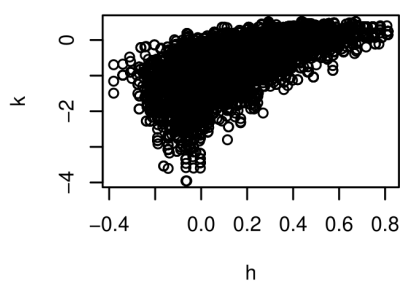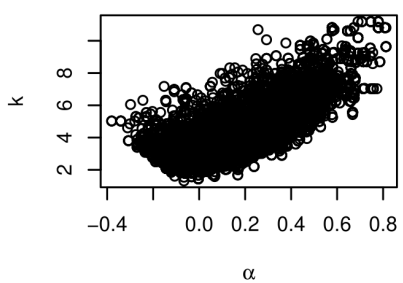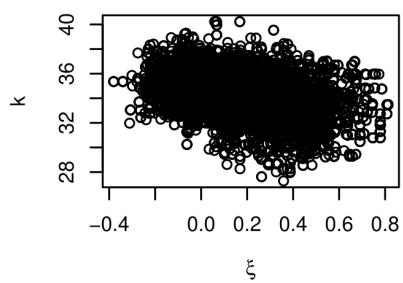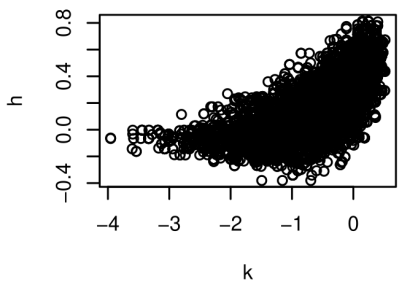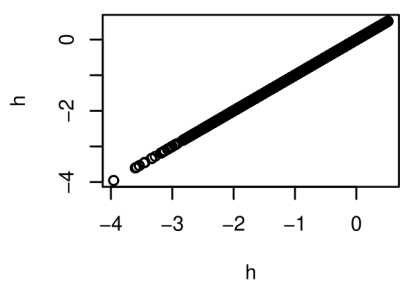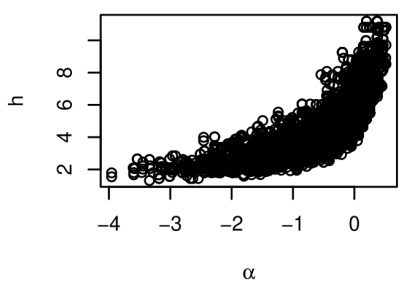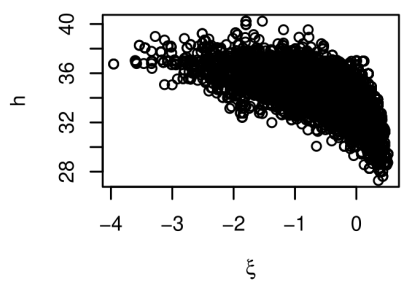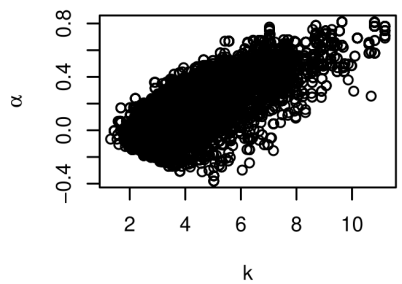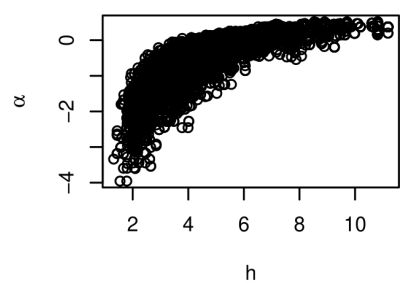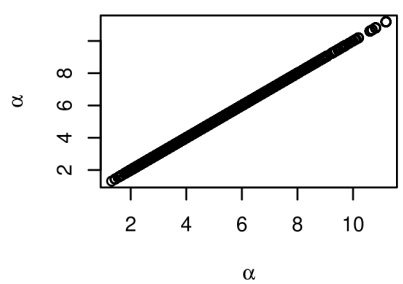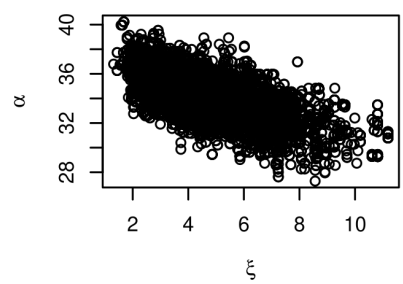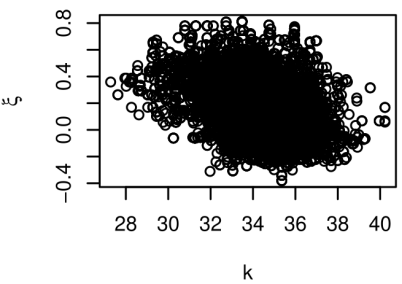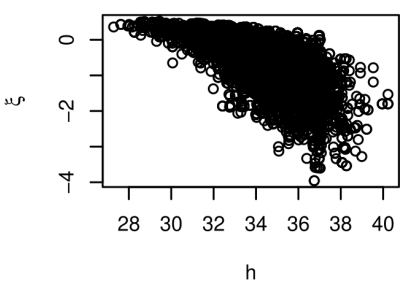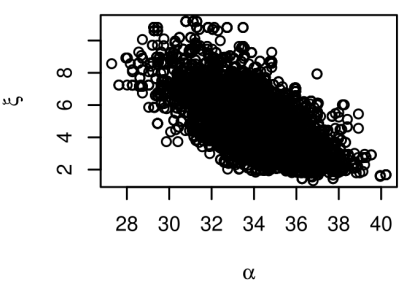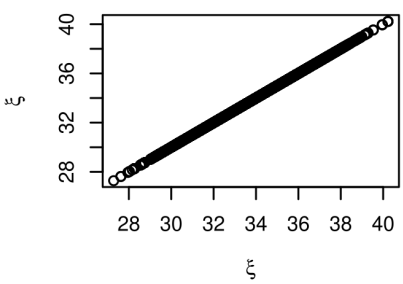

Supplement: s1 [file post_corr_m.pdf › mathematics-1017216-SM-xml/post_corr_m.pdf]

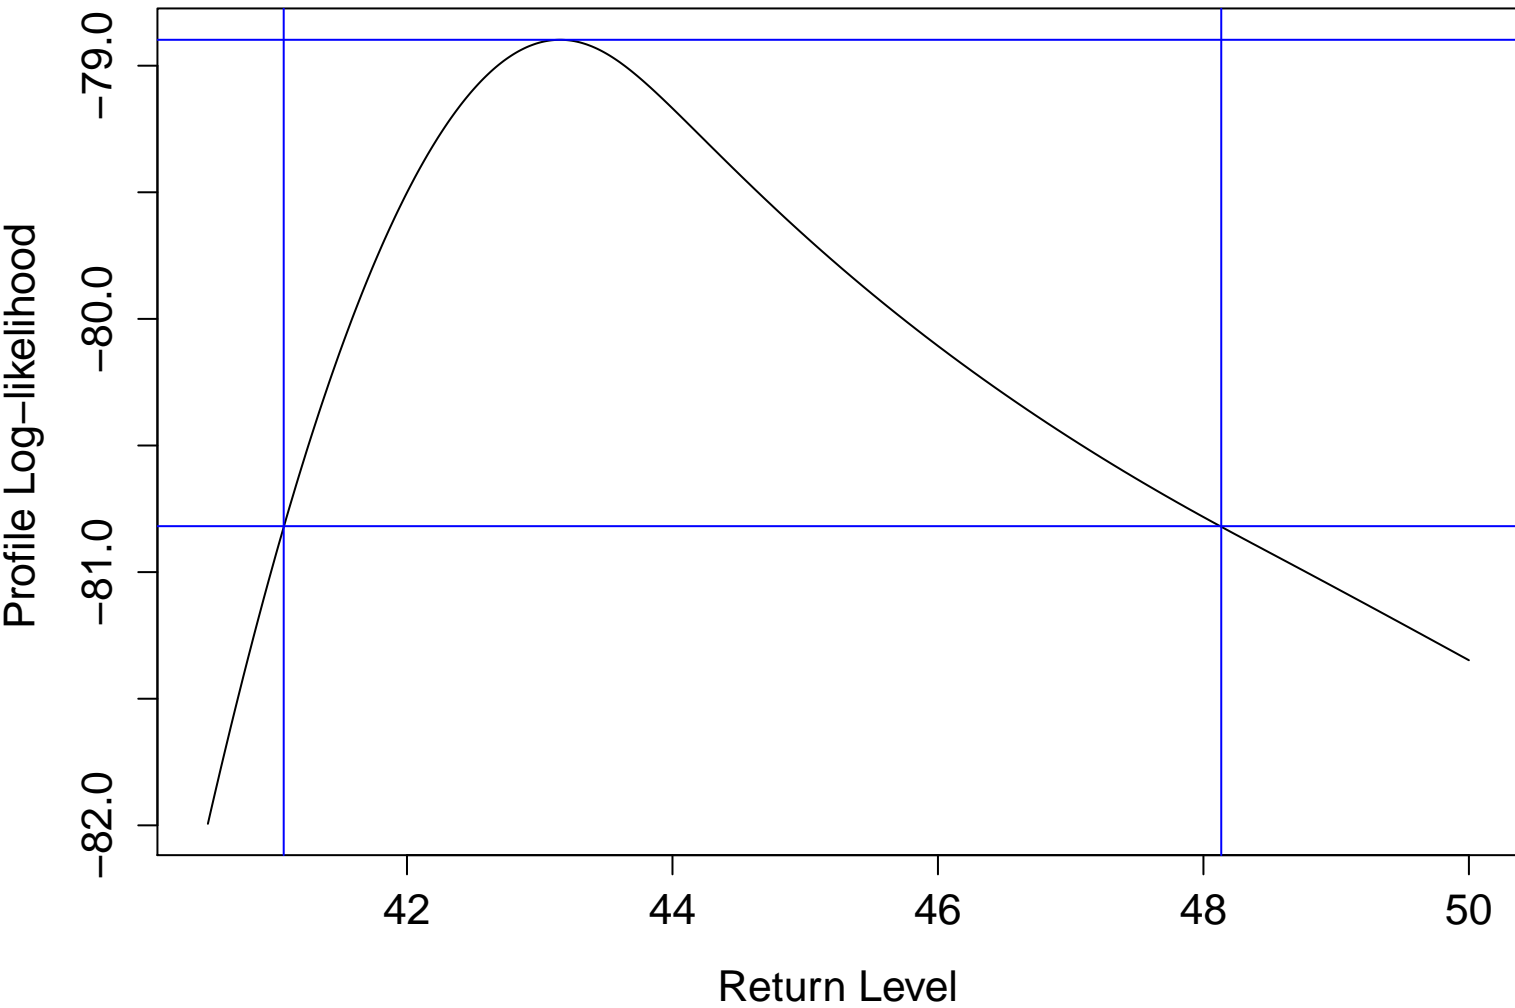

Supplement: s1 [file return_level_wind_udon-pdf.pdf › mathematics-1017216-SM-xml/return_level_wind_udon-pdf.pdf]

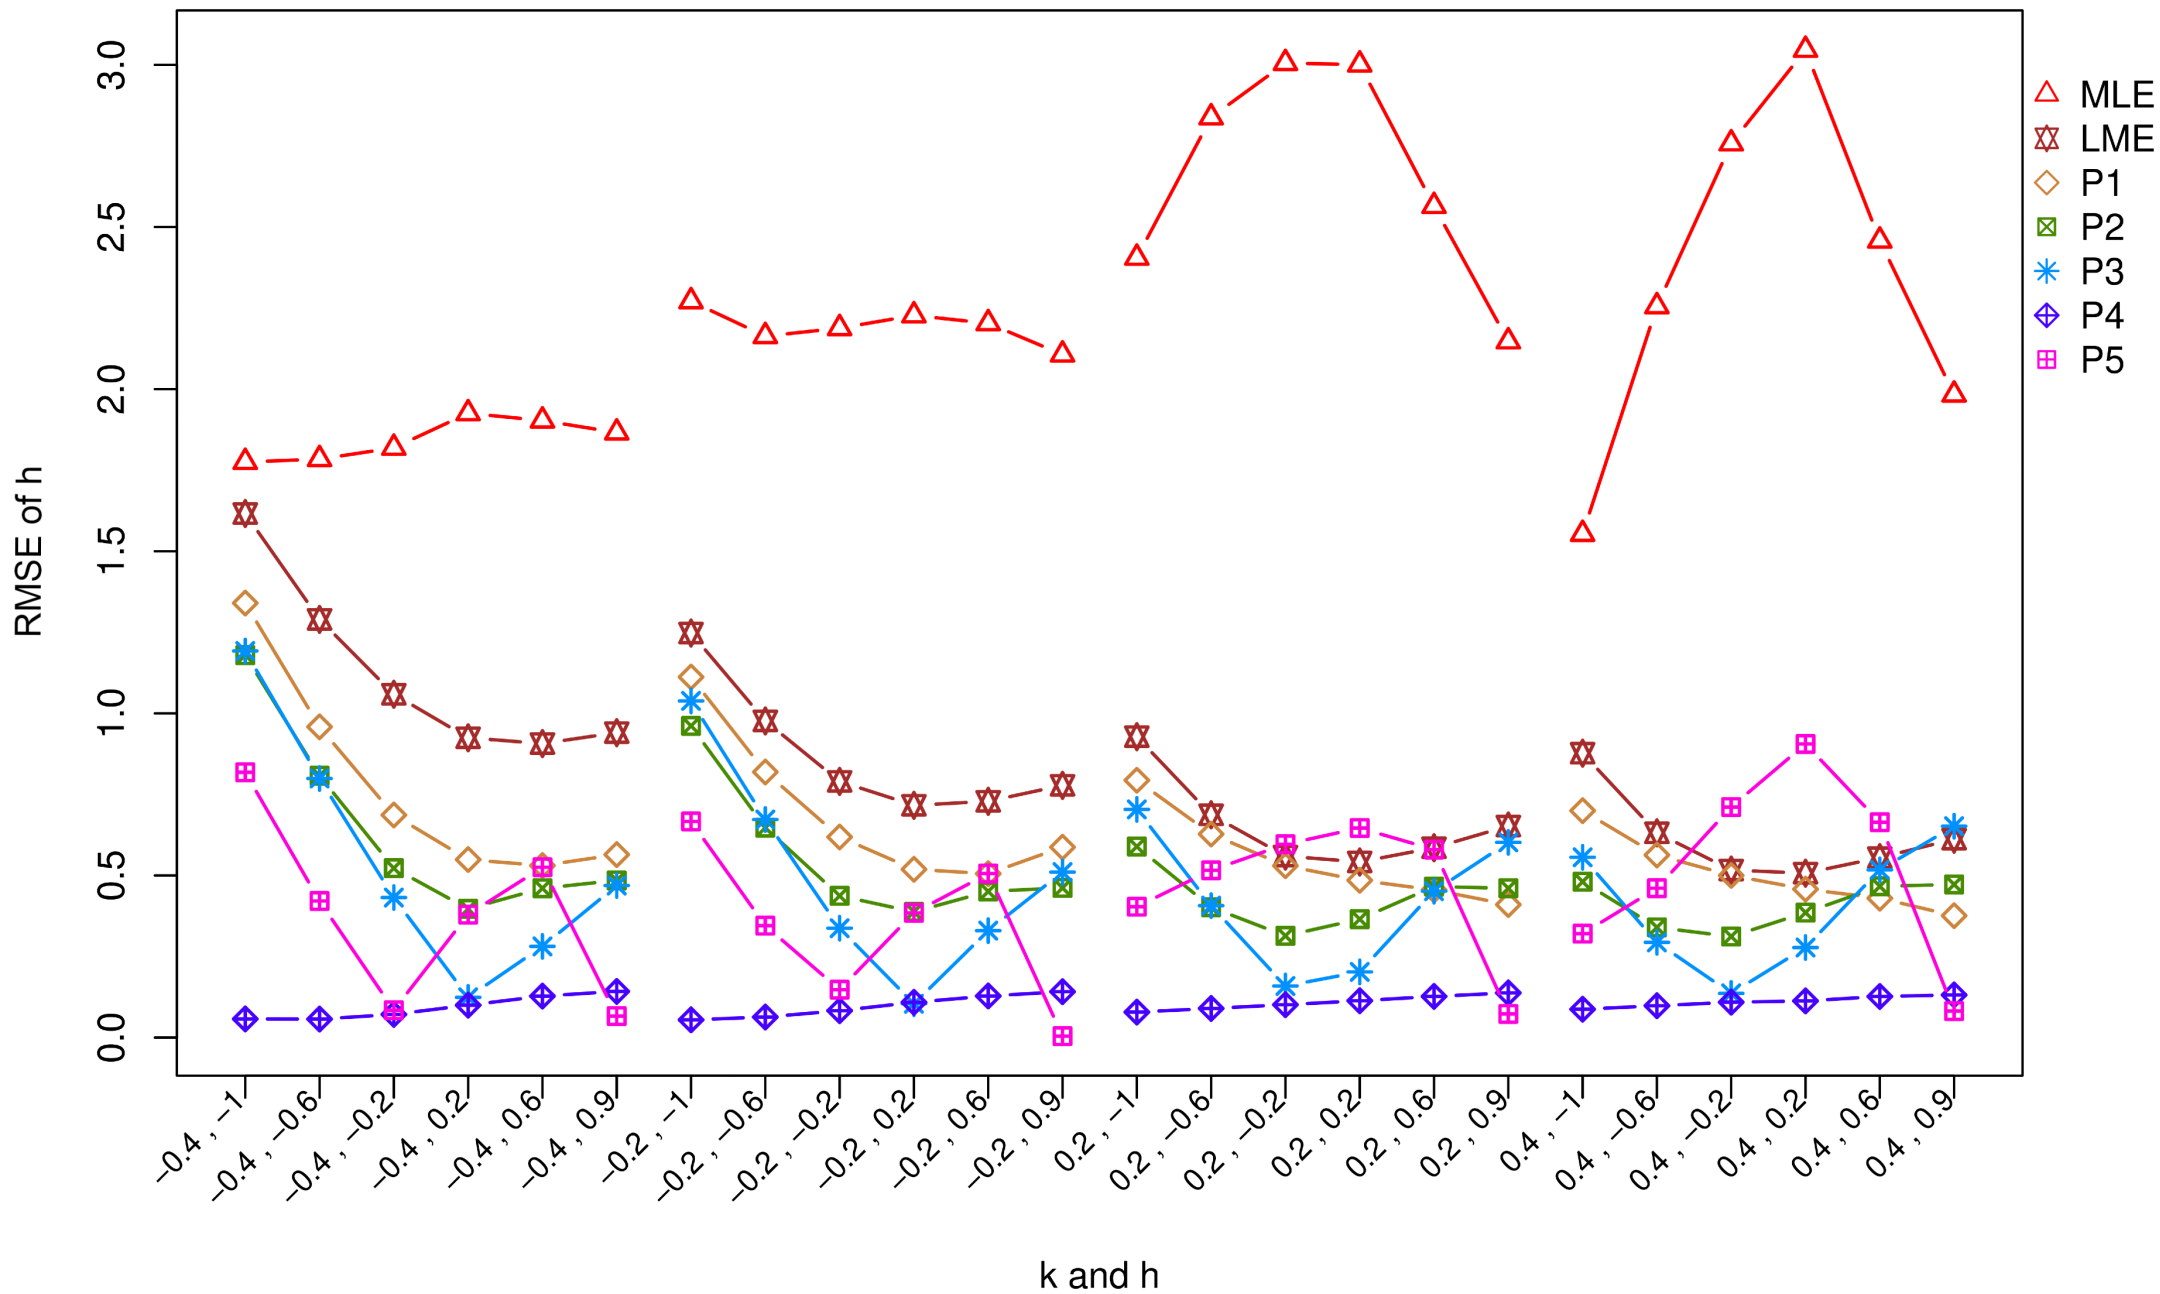

Supplement: s1 [file rmse_h_map_m.pdf › mathematics-1017216-SM-xml/rmse_h_map_m.pdf]

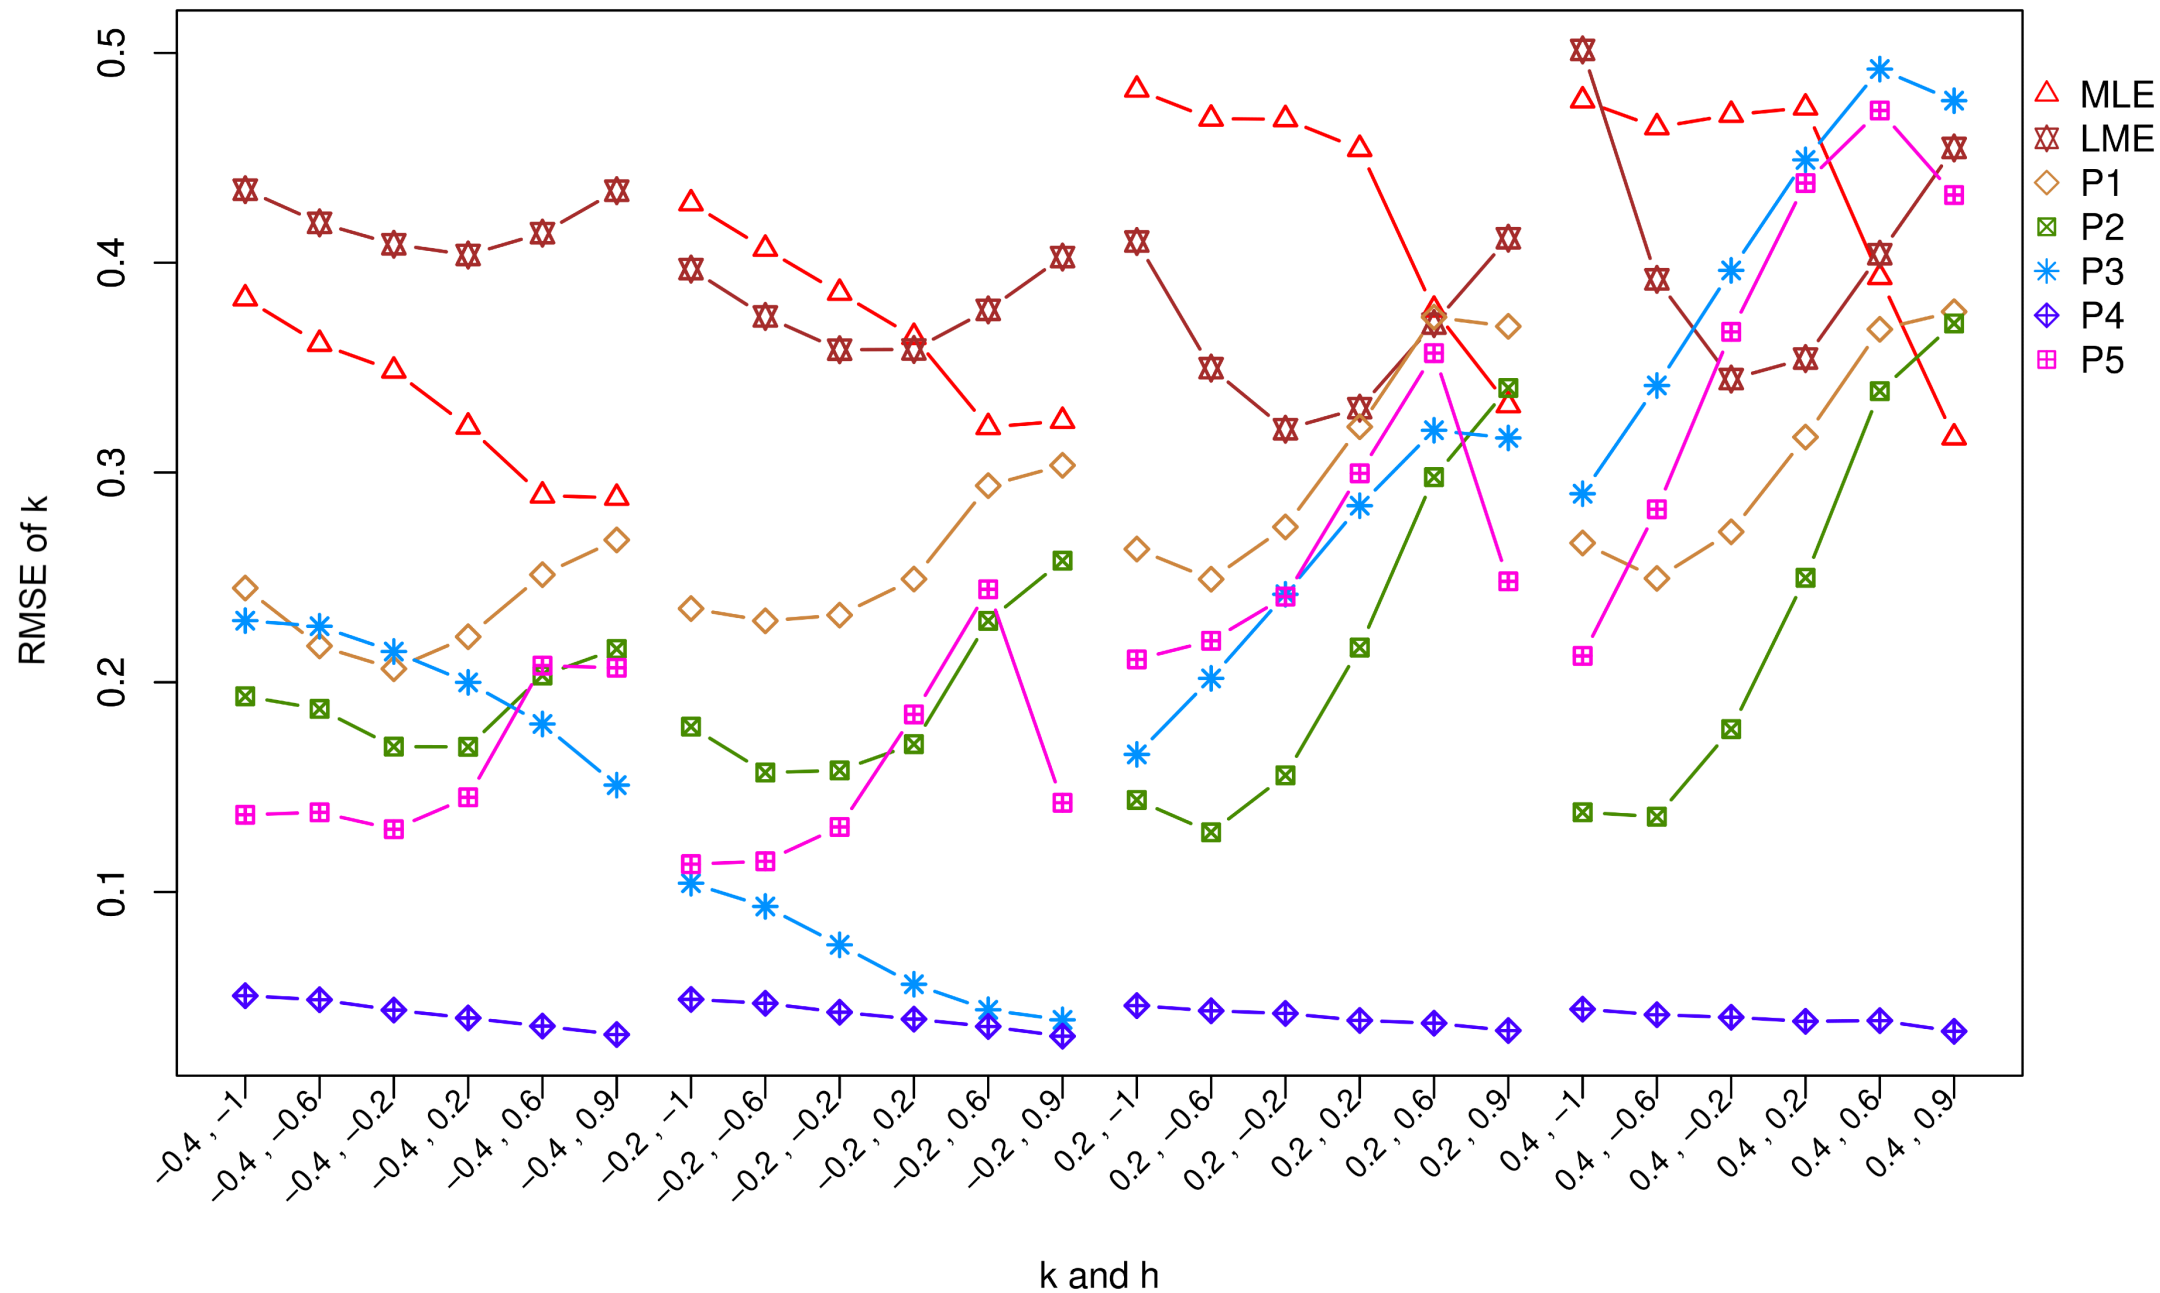

Supplement: s1 [file rmse_k_map_m.pdf › mathematics-1017216-SM-xml/rmse_k_map_m.pdf]

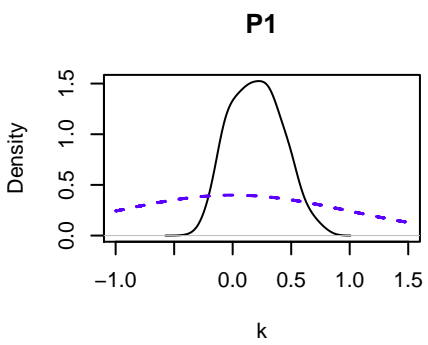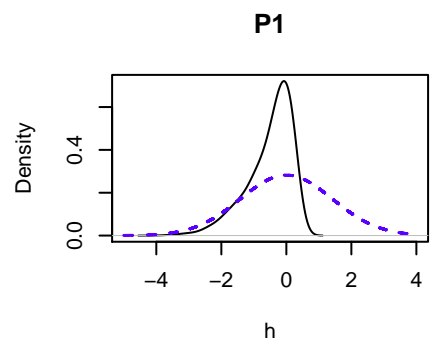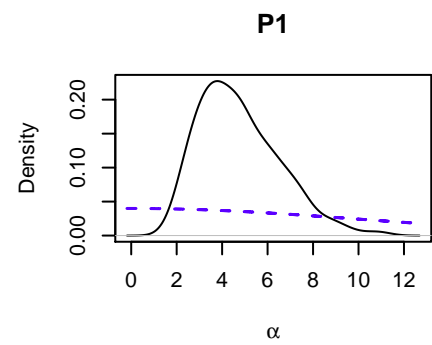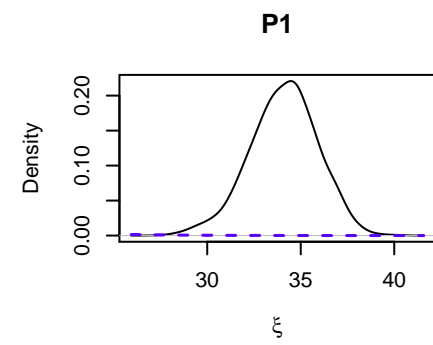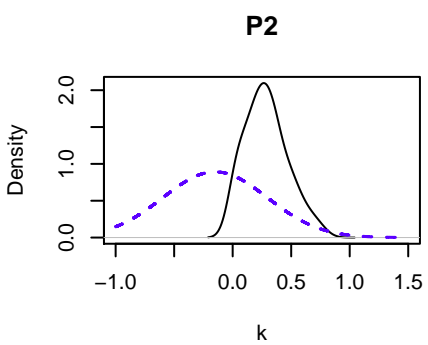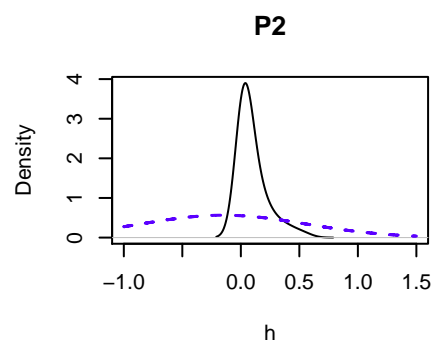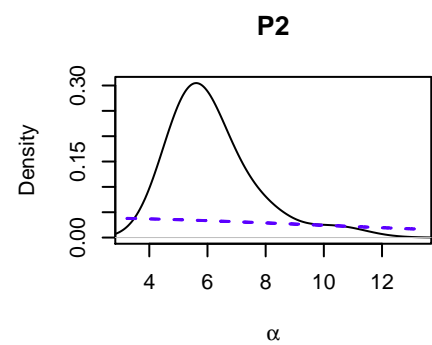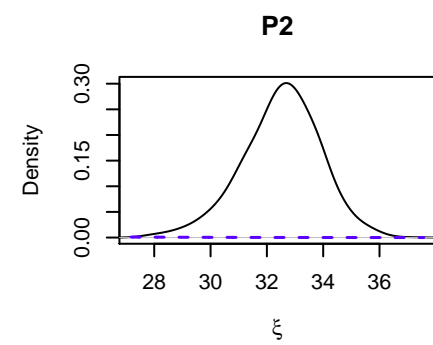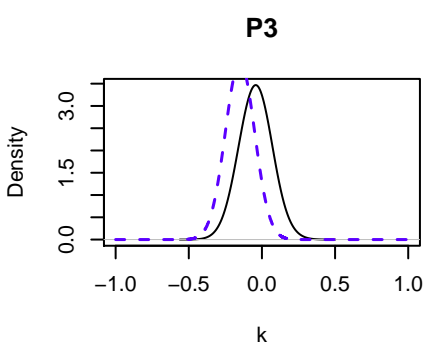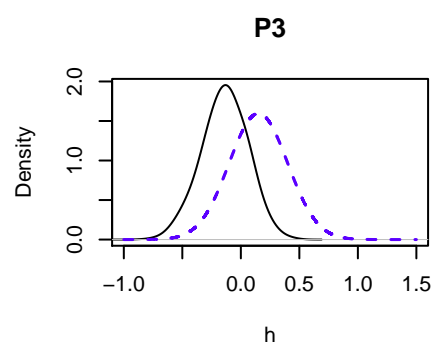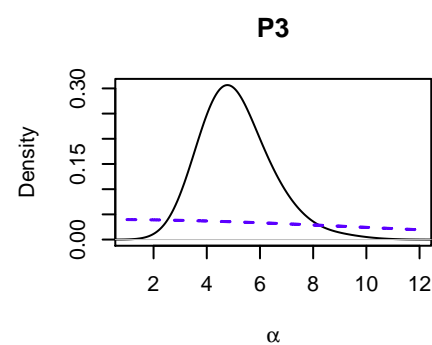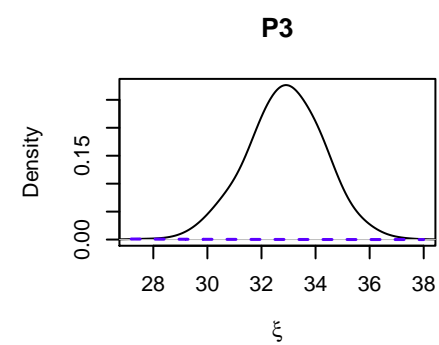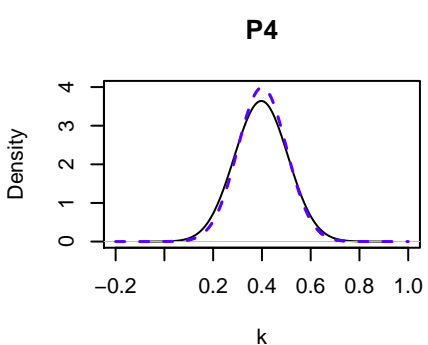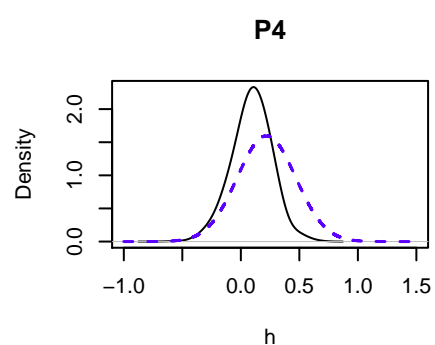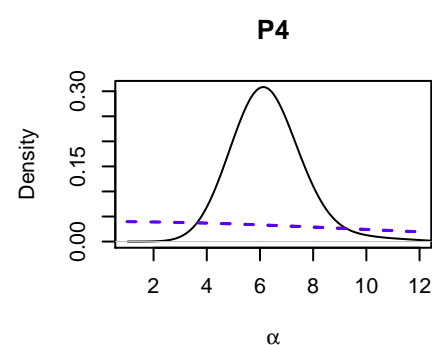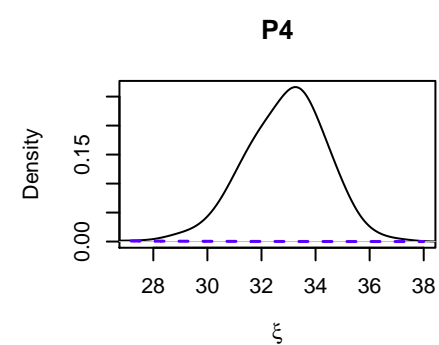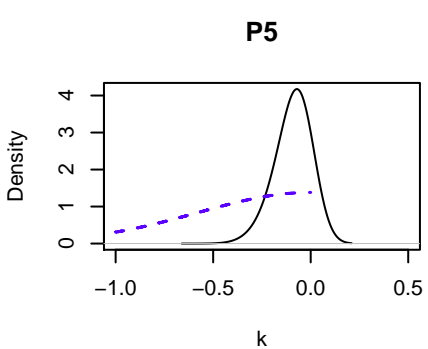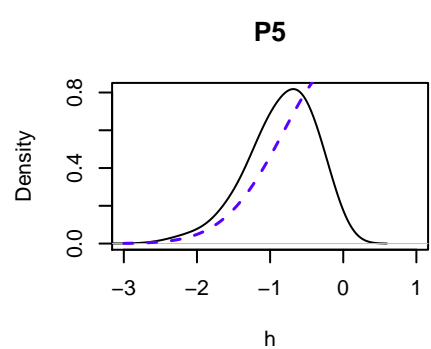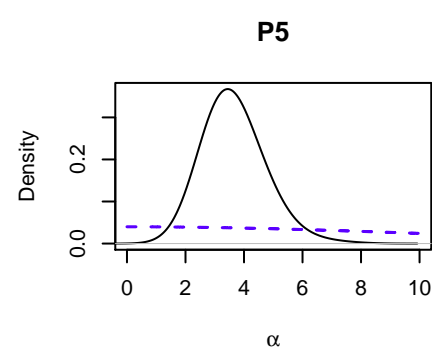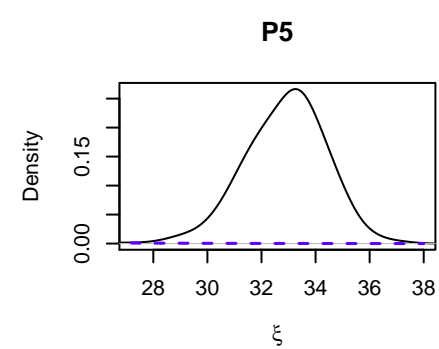

Supplement: s1 [file wind_udon2.pdf › mathematics-1017216-SM-xml/wind_udon2.pdf]
